# Supplementary material for: Evolutionary exploration of polytypism in lead halide perovskites
Source: Royal Society of Chemistry journal article supplement (doi:10.1039/d1sc03098a), 2021-01-01
Supplement: d1sc03098a1.pdf [file d1sc03098a1.pdf]

# Supporting Information:

## Evolutionary exploration of polytypism in lead halide perovskites

Zhenzhu Li,<sup>†</sup> Ji-Sang Park,<sup>‡</sup> and Aron Walsh<sup>\*,†,¶</sup>

<sup>†</sup>*Department of Materials, Imperial College London, London SW7 2AZ, UK*

<sup>‡</sup>*Department of Physics, Kyungpook National University, Daegu 41566, Korea*

<sup>¶</sup>*Department of Materials Science and Engineering, Yonsei University, Seoul 03722, Korea*

E-mail: a.walsh@imperial.ac.uk

Table S1: Comparison of ordering energies for unseen polytypes calculated from DFT and using the pre-trained model Hamiltonian (total energy in eV; ordering energy in meV/layer).

| New polytypes                    | $E_{Total,DFT}$ | $E_{Total,Model}$ | $E_{Ordering,DFT}$ | $E_{Ordering,Model}$ |
|----------------------------------|-----------------|-------------------|--------------------|----------------------|
| 11H(3c8h)-CsPbI <sub>3</sub>     | -135.243        | -134.766          | 30.8               | 74.2                 |
| 11H(3c8h)-CsPbBr <sub>3</sub>    | -154.256        | -154.371          | 45.8               | 35.4                 |
| 18H(1h8c1h8c)-CsPbI <sub>3</sub> | -220.376        | -220.343          | 82.6               | 84.4                 |
